# Supplementary material
Source: publisher figshare collection journal article supplement (https://acs.figshare.com/ndownloader/files/17489483)
Supplement: Supplementary file 1 [file 17489483]

## Sheet: Sheet1
	Chemotherapy group		Non-chemotherapy group
Peak Name	Fold Change	P-value	Fold Change	P-value
1030.52	16.64	0.0026	1.98	0.1373
1177.66	17.5	0.0053	1.57	>0.9999
1525.8	7.81	0.0067	2.42	0.1588
1115.66	15.36	0.0083	1.2	>0.9999
1034.48	7.22	0.0115	1.2	>0.9999
1169.74	3.07	0.0146	1.19	>0.9999
1015.71	5.95	0.0268	1	>0.9999
2154.12	9.22	0.0287	1.45	0.8535
2788.07	4.84	0.0379	2.29	0.1965
2126.12	4.51	0.053	1.41	0.7558
1269.75	3.81	0.0591	1.13	>0.9999
2804.11	3.38	0.0666	2.56	0.0125
1640.86	7.05	0.0725	2.67	0.4692
1890.03	2.44	0.0876	1.32	>0.9999
2521.23	3.14	0.1065	1.12	0.8384
1796.95	4.43	0.1567	1.06	>0.9999
1131.67	3.01	0.2346	1.04	>0.9999
2191.88	2.42	0.2568	1.51	0.992
1127.67	2.74	0.2662	1.34	>0.9999
1303.74	2.78	0.2935	1.44	>0.9999
1145.66	3.98	0.3147	1.09	>0.9999
935.46	2.51	0.3612	1.03	>0.9999
1243.7	2.13	0.5659	0.85	>0.9999
1606.86	2.93	0.8305	0.86	>0.9999
1055.48	9.88	>0.9999	1.26	>0.9999
1868.01	2.2	>0.9999	0.62	>0.9999
2544.31	3.41	>0.9999	1.01	>0.9999
